# Supplementary material for: Population Genomics of the Facultatively Mutualistic Bacteria Sinorhizobium meliloti and S. medicae
Source: PLOS journal article supplement (doi:10.1371/journal.pgen.1002868), 2012-08-02
Supplement: S5 (10.1371/journal.pgen.1002868.s005) [file journal.pgen.1002868.s005]

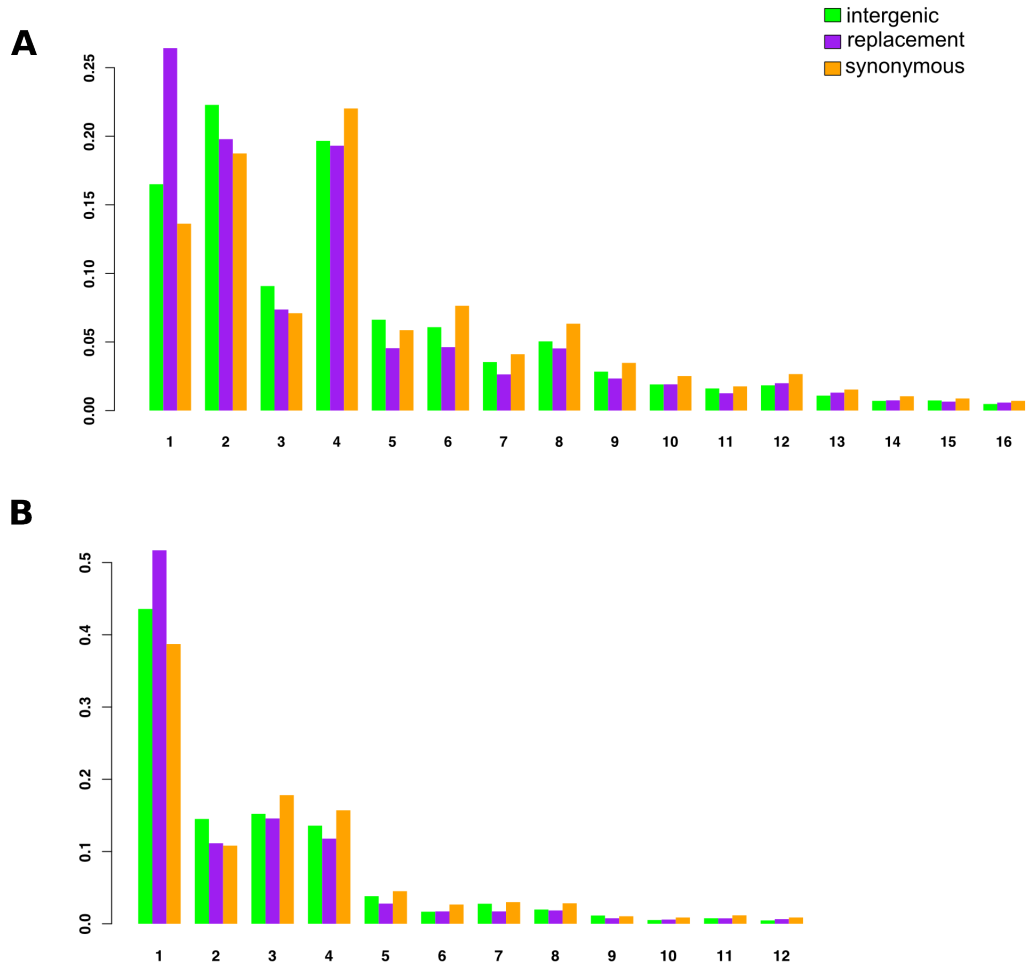

Figure S5: Minor allele frequency spectrum for the *S. meliloti* chromosome. The MAF spectrum for the full set of strains (A) shows a mode at 4. Reducing the sample to just the 24 strain lineage brings the MAF spectrum closer to neutral expectations (B).
